# Supplementary material
Source: PubMed Central journal article supplement (PMC1559898)
Supplement: rspb20053195s03.pdf [file rspb20053195s03.pdf]

# ELECTRONIC APPENDIX

This is the Electronic Appendix to the article

The extent of protist diversity: insights from molecular ecology  
of freshwater eukaryotes

by

Jan Šlapeta, David Moreira and Purificación López-García

*Proc. R. Soc. B* ([doi:10.1098/rspb.2005.3195](https://doi.org/10.1098/rspb.2005.3195))

Electronic appendices are refereed with the text; however, no attempt is made  
to impose a uniform editorial style on the electronic appendices.

Slapeta *et al.* - Electronic appendix: Fig. S1

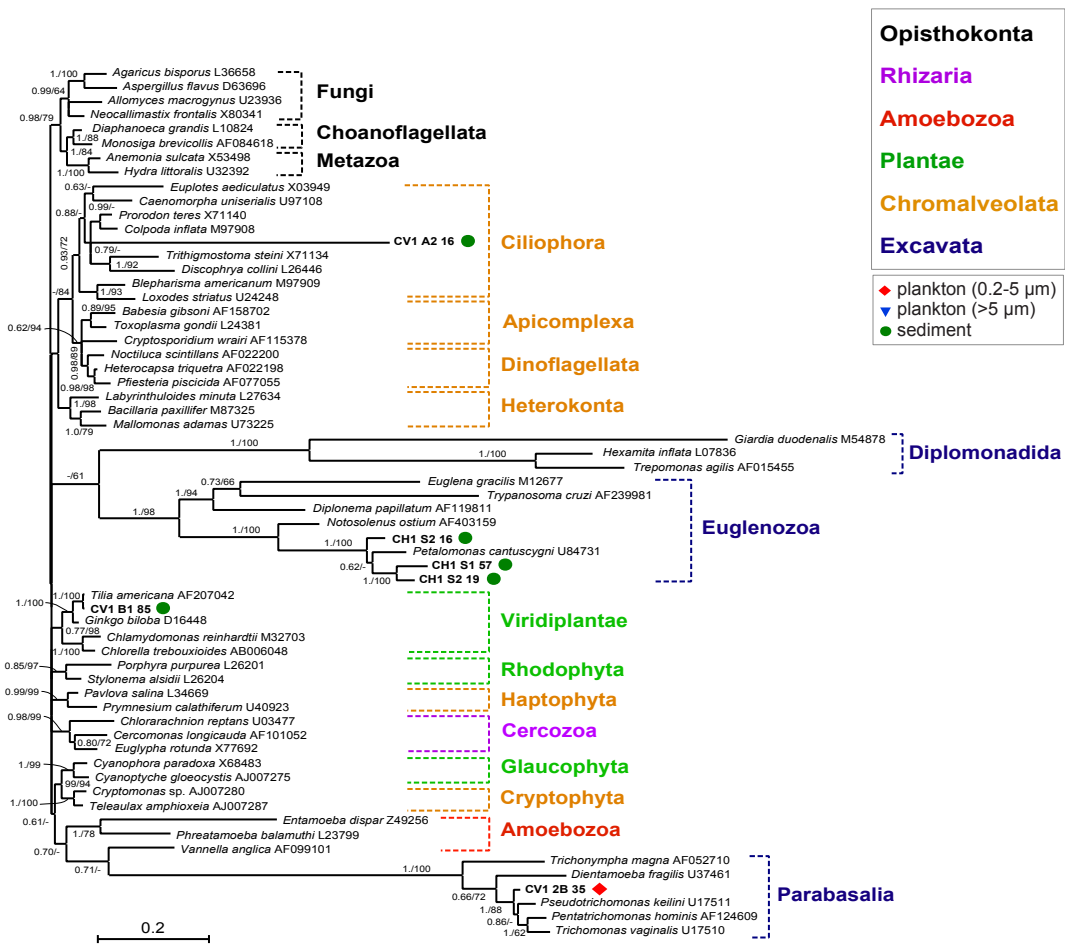

**Fig. S1.** Bayesian phylogenetic tree of eukaryotic SSU rDNA sequences retrieved from sediment and plankton of a suboxic pond (CV1) and an oxic freshwater shallow lake (CH1) showing the position of excavate and plant phylotypes and one divergent sequence, probably from a ciliate species. The tree was reconstructed using 1140 unambiguously aligned positions of 62 sequences of wide taxonomic distribution. Sequences derived from this study are highlighted in bold. The type of environment each phylotype was identified in is indicated by geometric symbols. Posterior probabilities >0.6 (left) and bootstrap values (right) > 60% are given at nodes. The scale bar represents the number of substitutions per 100 positions per a unit branch length.

# Slapeta *et al.* - Electronic appendix: Table S1

**Table S1.** Eukaryotic SSU rDNA clones and phylotypes from plankton and sediment of the oxic lake (CH1) and the suboxic pond (CV1) analysed in this work. Acc. No., accession number. The number of clones of a given phylotype retrieved from the planktonic fraction between 0.2-5  $\mu\text{m}$  (0.2), that > 5  $\mu\text{m}$  (5), and from sediment (S), is indicated. A phylotype is arbitrarily defined as a group of sequences having >97% nucleotide identity, and is represented by one sequence. The systematic affiliation was based in BLAST and phylogenetic analyses.

| Clone name | Acc. No. | 0.2 | CV1 5 | S  | 0.2 | CH1 5 | S | Systematic affiliation                                                                           | Closest NCBI-BLAST hit (Acc. No.)                       | BLAST alignment identities* | BLAST alignment Gaps** |
|------------|----------|-----|-------|----|-----|-------|---|--------------------------------------------------------------------------------------------------|---------------------------------------------------------|-----------------------------|------------------------|
| CV1_A2_16  | AY821980 | 0   | 0     | 1  | 0   | 0     | 0 | Eukaryota incertae sedis                                                                         | \$Caenomorphidae gen. sp. (AJ009661)                    | 844/1126 (74%)              | 101/1126 (8%)          |
| CH1_S2_24  | AY821921 | 0   | 0     | 0  | 0   | 0     | 1 | Eukaryota: Alveolata: Apicomplexa: Gregarina: Eugregarinida                                      | Uncultured alveolate clone CCA5 (AY179988)              | 1610/1707 (94%)             | 24/1707 (1%)           |
| CV1_2A_27  | AY821925 | 1   | 0     | 0  | 0   | 0     | 0 | Eukaryota: Alveolata: Ciliophora                                                                 | <i>Cryptocaryon irritans</i> (AF351579)                 | 1417/1582 (89%)             | 56/1582 (3%)           |
| CV1_A1_16  | AY821934 | 0   | 0     | 1  | 0   | 0     | 0 | Eukaryota: Alveolata: Ciliophora                                                                 | <i>Cryptocaryon irritans</i> (AF351579)                 | 1418/1590 (89%)             | 55/1590 (3%)           |
| CV1_B2_43  | AY821940 | 0   | 0     | 2  | 0   | 0     | 0 | Eukaryota: Alveolata: Ciliophora: Litostomatea                                                   | <i>Didinium nasutum</i> (U57771)                        | 1281/1419 (90%)             | 49/1419 (3%)           |
| CH1_2A_27  | AY821917 | 0   | 0     | 0  | 1   | 0     | 0 | Eukaryota: Alveolata: Ciliophora: Litostomatea: Haptoria: Haptorida                              | <i>Spathidium</i> sp. (Z22931)                          | 1426/1459 (97%)             | 8/1459 (0%)            |
| CV1_2A_28  | AY821926 | 1   | 0     | 0  | 0   | 0     | 0 | Eukaryota: Alveolata: Ciliophora: Litostomatea: Haptoria: Pleurostomatida                        | <i>Hemophysys proceca</i> (AY102175)                    | 1366/1470 (94%)             | 14/1470 (0%)           |
| CV1_5B_12  | AY821931 | 0   | 1     | 0  | 0   | 0     | 0 | Eukaryota: Alveolata: Ciliophora: Litostomatea: Trichostomalia: Vestibuliferida: Plagioplyidae   | <i>Plagioplyla frontata</i> (Z29440)                    | 1535/1587 (96%)             | 13/1587 (0%)           |
| CV1_2A_17  | AY821923 | 4   | 0     | 0  | 0   | 0     | 0 | Eukaryota: Alveolata: Ciliophora: Oligohymenophorea                                              | <i>Dextrichides pangii</i> (AY212805)                   | 1438/1585 (90%)             | 49/1585 (3%)           |
| CV1_2A_18  | AY821924 | 1   | 0     | 0  | 0   | 0     | 0 | Eukaryota: Alveolata: Ciliophora: Oligohymenophorea: Hymenostomatida: Tetrahymenina              | <i>Glaucoma scintillans</i> (AJ511861)                  | 1516/1545 (98%)             | 5/1545 (0%)            |
| CV1_5A_22  | AY821929 | 0   | 1     | 0  | 0   | 0     | 0 | Eukaryota: Alveolata: Ciliophora: Oligohymenophorea: Peniculida                                  | <i>Frontonia</i> sp. (AF255359)                         | 1442/1571 (91%)             | 48/1571 (3%)           |
| CH1_S1_82  | AY821919 | 0   | 0     | 0  | 0   | 0     | 1 | Eukaryota: Alveolata: Ciliophora: Oligohymenophorea: Scuticociliata: Pleuronematida              | <i>Pleuronema coronatum</i> (AY103188)                  | 1567/1580 (97%)             | 10/1580 (0%)           |
| CV1_B1_45  | AY821939 | 0   | 0     | 1  | 0   | 0     | 0 | Eukaryota: Alveolata: Ciliophora: Oligohymenophorea-like                                         | <i>Cyclidium porcatum</i> (Z29517)                      | 1416/1582 (89%)             | 54/1582 (3%)           |
| CV1_B2_52  | AY821941 | 0   | 0     | 6  | 0   | 0     | 0 | Eukaryota: Alveolata: Ciliophora: Oligohymenophorea-like                                         | <i>Anophyroides haemophila</i> (U51554)                 | 1390/1521 (91%)             | 41/1521 (2%)           |
| CV1_A1_26  | AY821935 | 0   | 0     | 1  | 0   | 0     | 0 | Eukaryota: Alveolata: Ciliophora: Phyllopharyngae                                                | <i>Heliohypha erhardi</i> (AY007448)                    | 1253/1493 (83%)             | 84/1493 (5%)           |
| CH1_S1_92  | AY821920 | 0   | 0     | 0  | 0   | 0     | 1 | Eukaryota: Alveolata: Ciliophora: Prostomatea: Prorodontida: Prorodontidae: Prorodon             | <i>Prorodon teres</i> (X71140)                          | 1567/1575 (99%)             | 3/1575 (0%)            |
| CV1_2A_6   | AY821927 | 2   | 0     | 0  | 0   | 0     | 0 | Eukaryota: Alveolata: Ciliophora: Spirotrichea                                                   | <i>Uroleptus gallina</i> (AF508779)                     | 1466/1596 (91%)             | 58/1596 (3%)           |
| CV1_B1_13  | AY821938 | 0   | 0     | 3  | 0   | 0     | 0 | Eukaryota: Alveolata: Ciliophora: Spirotrichea                                                   | <i>Halteria grandinella</i> (AF194410)                  | 1547/1601 (96%)             | 12/1601 (0%)           |
| CV1_A1_11  | AY821933 | 0   | 0     | 4  | 0   | 0     | 0 | Eukaryota: Alveolata: Ciliophora: Spirotrichea: Armophorida: Caenomorphidae: Caenomorpha         | <i>Caenomorpha</i> sp. (AJ009663)                       | 1250/1255 (99%)             | 2/1255 (0%)            |
| CV1_A2_24  | AY821936 | 34  | 28    | 12 | 0   | 0     | 0 | Eukaryota: Alveolata: Ciliophora: Spirotrichea: Armophorida: Caenomorphidae: Caenomorpha         | <i>Caenomorpha uniserialis</i> (U97108)                 | 1462/1493 (97%)             | 15/1493 (1%)           |
| CV1_5A_8   | AY821930 | 2   | 12    | 0  | 0   | 0     | 0 | Eukaryota: Alveolata: Ciliophora: Spirotrichea: Armophorida: Metopidae                           | <i>Metopus palaeformis</i> (AY007452)                   | 1439/1566 (91%)             | 52/1566 (3%)           |
| CV1_B2_81  | AY821942 | 0   | 0     | 1  | 0   | 0     | 0 | Eukaryota: Alveolata: Ciliophora: Spirotrichea: Armophorida: Metopidae                           | <i>Metopus palaeformis</i> (AY007452)                   | 1408/1483 (94%)             | 25/1483 (1%)           |
| CV1_5A_17  | AY821928 | 0   | 4     | 23 | 0   | 0     | 0 | Eukaryota: Alveolata: Ciliophora: Spirotrichea: Armophorida: Metopidae: Brachonella              | <i>Brachonella</i> sp. (AJ009665)                       | 1270/1275 (99%)             | 1/1275 (0%)            |
| CH1_5A_5   | AY821918 | 0   | 0     | 0  | 2   | 10    | 0 | Eukaryota: Alveolata: Ciliophora: Spirotrichea: Chroocitrichia: Tetinimida: Codonellidae         | <i>Tintinnopsis tubulosoides</i> (AF399111)             | 1553/1595 (97%)             | 8/1595 (0%)            |
| CH1_2A_10  | AY821916 | 0   | 0     | 0  | 2   | 0     | 0 | Eukaryota: Alveolata: Ciliophora: Spirotrichea: Chroocitrichia: Chroocitrichidae: Strobilidiidae | <i>Strobilidium caudatum</i> (AY143573)                 | 1511/1596 (94%)             | 20/1596 (1%)           |
| CV1_B1_1   | AY821937 | 0   | 0     | 3  | 0   | 0     | 0 | Eukaryota: Alveolata: Ciliophora: Spirotrichea: Hypotrichia: Euplotida                           | <i>Aspidisca steini</i> (AF305625)                      | 1389/1575 (88%)             | 61/1575 (3%)           |
| CV1_5B_8   | AY821932 | 2   | 1     | 0  | 0   | 0     | 0 | Eukaryota: Alveolata: Ciliophora: Spirotrichea: Hypotrichia: Euplotida: Euplotidae: Euplotes     | <i>Euplotes octocarinatus</i> (AJ310489)                | 1710/1735 (98%)             | 10/1735 (0%)           |
| CV1_2A_16  | AY821922 | 4   | 0     | 2  | 0   | 0     | 0 | Eukaryota: Alveolata: Ciliophora: Spirotrichea: Slichotrichia: Slichotrichidae: Oxytrichidae     | <i>Oxytricha granulifera</i> (X53486)                   | 1543/1567 (98%)             | 4/1567 (0%)            |
| CV1_B1_93  | AY821943 | 0   | 0     | 1  | 0   | 0     | 0 | Eukaryota: Centrohelzoa                                                                          | <i>&amp;Pterocystis</i> sp. JJP-2003 (AY268043)         | 962/1035 (92%)              | 35/1035 (3%)           |
| CV1_B2_46  | AY821944 | 0   | 0     | 1  | 0   | 0     | 0 | Eukaryota: Centrohelzoa                                                                          | <i>&amp;Pterocystis</i> sp. JJP-2003 (AY268043)         | 989/1054 (93%)              | 17/1054 (1%)           |
| CH1_2A_20  | AY821945 | 0   | 0     | 0  | 1   | 0     | 0 | Eukaryota: Cercozoa                                                                              | <i>Cryothecomonas longipes</i> (AF290540)               | 1508/1651 (91%)             | 55/1651 (3%)           |
| CV1_B1_11  | AY821946 | 0   | 0     | 1  | 0   | 0     | 0 | Eukaryota: Cercozoa                                                                              | <i>Cryothecomonas longipes</i> (AF290540)               | 1521/1626 (93%)             | 24/1626 (1%)           |
| CV1_B1_41  | AY821947 | 0   | 0     | 1  | 0   | 0     | 0 | Eukaryota: Cercozoa                                                                              | <i>&amp;Uncultured eukaryote clone CCA33 (AY180002)</i> | 1463/1652 (88%)             | 76/1652 (4%)           |
| CV1_B1_36  | AY821948 | 0   | 0     | 1  | 0   | 0     | 0 | Eukaryota: Choanoflagellida                                                                      | <i>&amp;Monosiga ovata</i> (AF271999)                   | 892/962 (92%)               | 20/962 (2%)            |
| CV1_B2_17  | AY821949 | 0   | 0     | 1  | 0   | 0     | 0 | Eukaryota: Choanoflagellida                                                                      | <i>Monosiga ovata</i> (AF271999)                        | 1398/1559 (89%)             | 55/1559 (3%)           |
| CH1_5A_4   | AY821954 | 0   | 0     | 0  | 6   | 2     | 0 | Eukaryota: Cryptophyta                                                                           | <i>Chromonas</i> sp. (AJ420699)                         | 1446/1613 (89%)             | 55/1613 (3%)           |
| CH1_2A_33  | AY821950 | 0   | 0     | 0  | 1   | 0     | 0 | Eukaryota: Cryptophyta: Cryptomonadaceae: Cryptomonas                                            | <i>Cryptomonas ovata</i> (AJ421147)                     | 1557/1571 (99%)             | 2/1571 (0%)            |
| CH1_2B_6   | AY821952 | 0   | 0     | 0  | 1   | 0     | 0 | Eukaryota: Cryptophyta: Cryptomonadaceae: Cryptomonas                                            | <i>Cryptomonas</i> sp. (AJ007281)                       | 1601/1605 (99%)             | 1/1605 (0%)            |
| CH1_5A_2   | AY821953 | 0   | 0     | 0  | 0   | 1     | 0 | Eukaryota: Cryptophyta: Cryptomonadaceae: Cryptomonas                                            | <i>Cryptomonas ovata</i> (AJ421147)                     | 1562/1578 (98%)             | 3/1578 (0%)            |
| CH1_S1_20  | AY821955 | 0   | 0     | 0  | 30  | 14    | 3 | Eukaryota: Cryptophyta: Cryptomonadaceae: Cryptomonas                                            | <i>Cryptomonas</i> sp. (AJ007280)                       | 1598/1606 (99%)             | 3/1606 (0%)            |
| CH1_2B_4   | AY821951 | 0   | 0     | 0  | 2   | 0     | 0 | Eukaryota: Cryptophyta: Teleostea                                                                | <i>Teleaulax amphioxiae</i> (AJ007287)                  | 1563/1585 (98%)             | 9/1585 (0%)            |
| CH1_S1_57  | AY821956 | 0   | 0     | 0  | 0   | 1     | 1 | Eukaryota: Euglenozoa: Euglenida: Sphenomonadales: Sphenomonadidae                               | <i>Petalomonas cantuscygni</i> (U84731)                 | 1576/1923 (81%)             | 148/1923 (7%)          |
| CH1_S2_16  | AY821957 | 0   | 0     | 0  | 0   | 1     | 1 | Eukaryota: Euglenozoa: Euglenida: Sphenomonadales: Sphenomonadidae                               | <i>Petalomonas cantuscygni</i> (AF386635)               | 1648/1987 (82%)             | 139/1987 (6%)          |
| CH1_S2_19  | AY821958 | 0   | 0     | 0  | 0   | 1     | 1 | Eukaryota: Euglenozoa: Euglenida: Sphenomonadales: Sphenomonadidae                               | <i>Petalomonas cantuscygni</i> (AF386635)               | 1406/1675 (83%)             | 106/1675 (6%)          |
| CV1_B1_65  | AY821966 | 0   | 0     | 1  | 0   | 0     | 0 | Eukaryota: Fungi: Ascomycota: Pezizomycotina                                                     | <i>Cucurbitaria berberidis</i> (U42481)                 | 1609/1623 (99%)             | 1/1623 (0%)            |
| CV1_B1_18  | AY821993 | 0   | 0     | 1  | 0   | 0     | 0 | Eukaryota: Fungi: Ascomycota: Taphrinomycetes: Taphrinales                                       | <i>Taphrina virginica</i> (AB000960)                    | 1599/1616 (98%)             | 4/1616 (0%)            |
| CH1_S1_66  | AY821990 | 0   | 0     | 0  | 0   | 0     | 1 | Eukaryota: Fungi: Basidiomycota: Hymenomycetes: Heterobasidiomycetes: Tremellomycetidae          | <i>Cryptococcus carnescens</i> (AB085798)               | 1632/1635 (99%)             | 2/1635 (0%)            |
| CV1_B1_42  | AY821994 | 0   | 0     | 1  | 0   | 0     | 0 | Eukaryota: Fungi: Basidiomycota: Hymenomycetes: Heterobasidiomycetes: Tremellomycetidae          | <i>Cryptococcus carnescens</i> (AB085798)               | 1610/1628 (98%)             | 1/1628 (0%)            |
| CV1_B2_69  | AY821998 | 0   | 0     | 2  | 0   | 0     | 0 | Eukaryota: Fungi: Basidiomycota: Ustilaginomycetes: Exobasidiomycetidae: Microstromatales        | <i>Rhodotorula bacarum</i> (AJ496257)                   | 1429/1432 (99%)             | -                      |
| CH1_2B_29  | AY821989 | 0   | 0     | 0  | 1   | 0     | 0 | Eukaryota: Fungi: Chytridiomycota                                                                | <i>Catenomyces</i> sp. JEL342 (AY635830)                | 1510/1603 (94%)             | 23/1603 (1%)           |
| CV1_B1_10  | AY821992 | 0   | 0     | 2  | 0   | 0     | 0 | Eukaryota: Fungi: Chytridiomycota                                                                | <i>Allomyces arbuscula</i> (AY552524)                   | 1580/1691 (93%)             | 36/1691 (2%)           |
| CV1_B1_58  | AY821995 | 0   | 0     | 1  | 0   | 0     | 0 | Eukaryota: Fungi: Chytridiomycota                                                                | <i>Allomyces arbuscula</i> (AY552524)                   | 1564/1697 (92%)             | 45/1697 (2%)           |
| CH1_S2_50  | AY821991 | 0   | 0     | 0  | 0   | 0     | 1 | Eukaryota: Fungi: Fungi incertae sedis                                                           | Unidentified eukaryote LKM11 (AJ130849)                 | 1350/1500 (87%)             | 71/1500 (4%)           |
| CV1_B2_34  | AY821997 | 0   | 0     | 2  | 0   | 0     | 0 | Eukaryota: Fungi: Fungi incertae sedis                                                           | Unidentified eukaryote LKM11 (AJ130849)                 | 1417/1463 (96%)             | 7/1463 (0%)            |
| CV1_B1_97  | AY821959 | 0   | 0     | 1  | 0   | 0     | 0 | Eukaryota: Haptophyceae                                                                          | # Uncultured dinoflagellate CCA32 (AY179990)            | 536/626 (85%)               | 43/626 (6%)            |
| CV1_B2_32  | AY821960 | 0   | 0     | 1  | 0   | 0     | 0 | Eukaryota: Haptophyceae                                                                          | # <i>Sporodiniella umbellata</i> (AF157160)             | 553/636 (86%)               | 34/636 (5%)            |
| CV1_B1_92  | AY821961 | 0   | 0     | 1  | 0   | 0     | 0 | Eukaryota: Lobosia                                                                               | Uncultured eukaryote BOL868 (AF327925)                  | 1349/1522 (88%)             | 54/1522 (3%)           |
| CH1_S1_77  | AY821984 | 0   | 0     | 0  | 0   | 7     | 0 | Eukaryota: Metazoa: Annelida: Ciliellata: Oligochaeta: Haplotaxida: Tubificina: Tubificidae      | <i>Limnodrilus hoffmeisteri</i> (AF360992)              | 1609/1613 (99%)             | 2/1613 (0%)            |
| CV1_5A_4   | AY821985 | 0   | 1     | 0  | 0   | 0     | 0 | Eukaryota: Metazoa: Arthropoda: Crustacea: Ostracoda: Podocopa: Podocopida                       | <i>Cypridopsis</i> sp. (AF363307)                       | 1601/1615 (99%)             | 4/1615 (0%)            |
| CH1_S1_38  | AY821982 | 0   | 0     | 0  | 0   | 19    | 0 | Eukaryota: Metazoa: Gastrotricha: Chaetonolida: Paucitubulatina: Chaetonolidae                   | <i>Chaetonotus</i> sp. (AJ001735)                       | 1637/1669 (98%)             | 6/1669 (0%)            |
| CV1_B1_5   | AY821983 | 0   | 0     | 42 | 0   | 0     | 0 | Eukaryota: Metazoa: Gastrotricha: Chaetonolida: Paucitubulatina: Chaetonolidae                   | Unidentified eukaryote LKM88 (AJ130867)                 | 1533/1550 (98%)             | 4/1550 (0%)            |
| CH1_S1_25  | AY821981 | 0   | 0     | 0  | 0   | 1     | 0 | Eukaryota: Metazoa: Nematoda: Enoplea: Enopliida                                                 | Unidentified nematode PTrPsp (AY284737)                 | 1542/1642 (93%)             | 21/1642 (1%)           |
| CH1_S1_76  | AY821983 | 0   | 0     | 0  | 0   | 13    | 0 | Eukaryota: Metazoa: Platyhelminthes: Turbellaria: Macrostromorpha: Macrostromida                 | <i>Microstromum lineare</i> (D85092)                    | 1621/1652 (98%)             | 26/1652 (1%)           |
| CV1_A1_10  | AY821986 | 0   | 0     | 2  | 0   | 0     | 0 | Eukaryota: Metazoa: Rotifera: Bdelloidea: Philodinida: Philodinidae                              | <i>Philodina acuticornis</i> (U41281)                   | 1621/1655 (97%)             | 15/1655 (0%)           |
| CV1_A1_28  | AY821987 | 0   | 0     | 1  | 0   | 0     | 0 | Eukaryota: Metazoa: Rotifera: Monogononta                                                        | <i>Lepadella patella</i> (AY218117)                     | 1623/1637 (99%)             | -                      |
| CV1_2B_35  | AY821962 | 2   | 0     | 0  | 0   | 0     | 0 | Eukaryota: Parabasalidae: Trichomonadida: Trichomonadidae: Trichomonadidae                       | <i>Pentatricomonas hominis</i> (AF124609)               | 1249/1345 (92%)             | 22/1345 (1%)           |
| CV1_S1_35  | AY821967 | 0   | 0     | 0  | 0   | 1     | 0 | Eukaryota: stramenopiles                                                                         | <i>Ochromonas tuberculata</i> (AF123293)                | 1461/1605 (91%)             | 46/1605 (2%)           |
| CV1_B2_82  | AY821977 | 0   | 0     | 1  | 0   | 0     | 0 | Eukaryota: stramenopiles: Bacillariophyta                                                        | <i>Dickieia ulvacea</i> (AY485462)                      | 1461/1543 (94%)             | 21/1543 (1%)           |
| CV1_B1_87  | AY821973 | 0   | 0     | 1  | 0   | 0     | 0 | Eukaryota: stramenopiles: Bacillariophyta: Bacillariophyceae: Bacillariophycidae: Bacillariales  | <i>Nitzschia thermalis</i> (AY485458)                   | 1566/1587 (98%)             | 4/1587 (0%)            |
| CV1_B1_61  | AY821971 | 0   | 0     | 1  | 0   | 0     | 0 | Eukaryota: stramenopiles: Bacillariophyta: Bacillariophyceae: Bacillariophycidae: Naviculales    | <i>Navicula</i> sp. (AY485513)                          | 1567/1588 (98%)             | 1/1588 (0%)            |
| CV1_B2_38  | AY821975 | 0   | 0     | 1  | 0   | 0     | 0 | Eukaryota: stramenopiles: Bacillariophyta: Bacillariophyceae: Eunotiophyceae: Eunotiales         | <i>Eunotia monodon</i> (AB085831)                       | 1540/1553 (99%)             | 4/1553 (0%)            |
| CH1_2A_3   | AY821964 | 0   | 0     | 0  | 1   | 0     | 0 | Eukaryota: stramenopiles: Bicosocida                                                             | <i>Adriamonas peritocrescens</i> (AF243501)             | 1432/1598 (89%)             | 59/1598 (3%)           |
| CH1_2B_3   | AY821965 | 0   | 0     | 0  | 1   | 0     | 0 | Eukaryota: stramenopiles: Bicosocida                                                             | <i>Adriamonas peritocrescens</i> (AF243501)             | 1494/1597 (93%)             | 30/1597 (1%)           |
| CH1_5A_8   | AY821966 | 0   | 0     | 0  | 0   | 1     | 0 | Eukaryota: stramenopiles: Bicosocida                                                             | <i>Adriamonas peritocrescens</i> (AF243501)             | 1494/1605 (92%)             |                        |
